# Supplementary material for: A core outcome set for studies of gestational diabetes mellitus prevention and treatment
Source: Springer Nature journal article supplement (doi:10.1007/s00125-020-05123-6), 2020-03-20

**ESM Table 2: Outcomes included in e-Delphi Round 1 and number and percentage of respondents giving each outcome a “high” score of 7-9.**

|                                     | <b>Group 1: Patient Representatives</b> |          | <b>Group 2: Health Care Professionals</b> |          | <b>Group 3: Researchers</b>     |          |
|-------------------------------------|-----------------------------------------|----------|-------------------------------------------|----------|---------------------------------|----------|
|                                     | <b>Scoring each outcome 7-9</b>         |          | <b>Scoring each outcome 7-9</b>           |          | <b>Scoring each outcome 7-9</b> |          |
| <b>Prevention Outcome</b>           | <b>n = 23</b>                           | <b>%</b> | <b>n = 116</b>                            | <b>%</b> | <b>n = 34</b>                   | <b>%</b> |
| <b>1. Maternal Outcomes</b>         |                                         |          |                                           |          |                                 |          |
| GDM Diagnosis                       | 21                                      | 91%      | 108                                       | 93%      | 32                              | 94%      |
| Gestational Weight Gain             | 17                                      | 74%      | 93                                        | 80%      | 26                              | 76%      |
| Increase in BMI during pregnancy    | 13                                      | 57%      | 72                                        | 62%      | 21                              | 62%      |
| Body Composition                    | 12                                      | 52%      | 41                                        | 35%      | 14                              | 41%      |
| Skin Fold thickness                 | 9                                       | 39%      | 30                                        | 26%      | 12                              | 35%      |
| Waist Circumference                 | 12                                      | 52%      | 44                                        | 38%      | 15                              | 44%      |
| Postpartum weight retention         | 14                                      | 61%      | 79                                        | 68%      | 26                              | 76%      |
| Requirement for insulin therapy     | 20                                      | 87%      | 105                                       | 91%      | 32                              | 94%      |
| Blood pressure                      | 17                                      | 74%      | 88                                        | 76%      | 28                              | 82%      |
| Hypertensive disorders of pregnancy | 20                                      | 87%      | 90                                        | 78%      | 30                              | 88%      |

|                                      |    |     |  |     |     |  |    |     |
|--------------------------------------|----|-----|--|-----|-----|--|----|-----|
| Maternal hospitalisation             | 12 | 52% |  | 71  | 61% |  | 24 | 71% |
| Placental abruption                  | 17 | 74% |  | 59  | 51% |  | 23 | 68% |
| Dietary intake                       | 18 | 78% |  | 91  | 78% |  | 24 | 71% |
| Physical activity                    | 16 | 70% |  | 90  | 78% |  | 24 | 71% |
| Self-rated health                    | 13 | 57% |  | 63  | 54% |  | 21 | 62% |
| Quality of life                      | 16 | 70% |  | 74  | 64% |  | 23 | 68% |
| Self-rated diet                      | 12 | 52% |  | 54  | 47% |  | 15 | 44% |
| Induction of labour                  | 11 | 48% |  | 63  | 54% |  | 20 | 59% |
| Mode of birth                        | 15 | 65% |  | 81  | 70% |  | 28 | 82% |
| Termination of pregnancy             | 7  | 30% |  | 56  | 48% |  | 16 | 47% |
| Miscarriage                          | 14 | 61% |  | 66  | 57% |  | 18 | 53% |
| Maternal accident                    | 12 | 52% |  | 31  | 27% |  | 10 | 29% |
| Maternal sepsis                      | 14 | 61% |  | 57  | 49% |  | 19 | 56% |
| Hospitalisation during the pregnancy | 13 | 57% |  | 62  | 53% |  | 21 | 62% |
| Admission to the HDU                 | 14 | 61% |  | 67  | 58% |  | 23 | 68% |
| Intrapartum haemorrhage              | 15 | 65% |  | 52  | 45% |  | 19 | 56% |
| Postpartum haemorrhage               | 15 | 65% |  | 54  | 47% |  | 23 | 68% |
| Perineal trauma                      | 10 | 43% |  | 59  | 51% |  | 23 | 68% |
| Fasting blood glucose                | 18 | 78% |  | 103 | 89% |  | 30 | 88% |
| Postprandial glucose                 | 18 | 78% |  | 97  | 84% |  | 27 | 79% |
| Insulin                              | 17 | 74% |  | 58  | 50% |  | 22 | 65% |
| Hba1c                                | 18 | 78% |  | 91  | 78% |  | 28 | 82% |
| C peptide                            | 14 | 61% |  | 57  | 49% |  | 15 | 44% |
| Ferritin                             | 12 | 52% |  | 33  | 28% |  | 14 | 41% |
| Maternal lipid profile               | 12 | 52% |  | 59  | 51% |  | 14 | 41% |
| Haemoglobin                          | 12 | 52% |  | 43  | 37% |  | 11 | 32% |
| High sensitivity CRP                 | 13 | 57% |  | 30  | 26% |  | 9  | 26% |
| HOMA-IR                              | 15 | 65% |  | 59  | 51% |  | 20 | 59% |

|                                                 |    |     |  |     |     |  |    |     |
|-------------------------------------------------|----|-----|--|-----|-----|--|----|-----|
| IL-6                                            | 11 | 48% |  | 24  | 21% |  | 6  | 18% |
| Leptin                                          | 11 | 48% |  | 27  | 23% |  | 4  | 12% |
| Cortisol                                        | 11 | 48% |  | 30  | 26% |  | 5  | 15% |
| Non-esterified fatty acids                      | 9  | 39% |  | 27  | 23% |  | 9  | 26% |
| Ratio of plasminogen activator inhibitor 1 to 2 | 9  | 39% |  | 23  | 20% |  | 13 | 38% |
| Vitamin D level                                 | 13 | 57% |  | 45  | 39% |  | 6  | 18% |
| <b>2. Neonatal Outcomes</b>                     |    |     |  |     |     |  |    |     |
| Preterm birth                                   | 17 | 74% |  | 83  | 72% |  | 31 | 91% |
| Gestational week at birth                       | 17 | 74% |  | 95  | 82% |  | 32 | 94% |
| Neonatal death                                  | 18 | 78% |  | 91  | 78% |  | 31 | 91% |
| Stillbirth                                      | 18 | 78% |  | 90  | 78% |  | 31 | 91% |
| Small for gestational age                       | 16 | 70% |  | 87  | 75% |  | 30 | 88% |
| Large for gestational age                       | 18 | 78% |  | 101 | 87% |  | 33 | 97% |
| Macrosomia                                      | 16 | 70% |  | 94  | 81% |  | 29 | 85% |
| Birthweight                                     | 19 | 83% |  | 99  | 85% |  | 32 | 94% |
| Skinfold thickness                              | 14 | 61% |  | 44  | 38% |  | 17 | 50% |
| Baby anthropometry                              | 17 | 74% |  | 74  | 64% |  | 25 | 74% |
| % body fat neonate                              | 13 | 57% |  | 50  | 43% |  | 19 | 56% |
| APGAR                                           | 15 | 65% |  | 77  | 66% |  | 27 | 79% |
| Pondoral index                                  | 10 | 43% |  | 55  | 47% |  | 20 | 59% |
| Respiratory distress                            | 16 | 70% |  | 75  | 65% |  | 26 | 76% |
| Hyperbilirubinemia                              | 13 | 57% |  | 73  | 63% |  | 25 | 74% |
| Congenital malformation                         | 14 | 61% |  | 82  | 71% |  | 26 | 76% |
| Brachial plexus injury                          | 12 | 52% |  | 89  | 77% |  | 29 | 85% |
| Bone fracture                                   | 13 | 57% |  | 76  | 66% |  | 27 | 79% |
| Shoulder dystocia                               | 11 | 48% |  | 94  | 81% |  | 28 | 82% |
| Neonatal sepsis                                 | 15 | 65% |  | 67  | 58% |  | 21 | 62% |
| Retinopathy of                                  | 14 | 61% |  | 54  | 47% |  | 18 | 53% |

|                                          |    |     |  |    |     |  |    |     |
|------------------------------------------|----|-----|--|----|-----|--|----|-----|
| prematurity                              |    |     |  |    |     |  |    |     |
| Neonatal hypoglycaemia                   | 18 | 78% |  | 99 | 85% |  | 29 | 85% |
| Neonatal internal haemorrhage            | 16 | 70% |  | 60 | 52% |  | 18 | 53% |
| Need for mechanical ventilation          | 16 | 70% |  | 71 | 61% |  | 20 | 59% |
| Necrotising enterocolitis                | 15 | 65% |  | 54 | 47% |  | 19 | 56% |
| Admission to neonatal ICU                | 16 | 70% |  | 91 | 78% |  | 27 | 79% |
| Number of days in special baby care unit | 13 | 57% |  | 83 | 72% |  | 27 | 79% |
| Number of days in hospital               | 13 | 57% |  | 79 | 68% |  | 25 | 74% |
| Discharge home on oxygen                 | 13 | 57% |  | 52 | 45% |  | 16 | 47% |
| <b>3. Other Outcomes</b>                 |    |     |  |    |     |  |    |     |
| Health cost analysis                     | 14 | 61% |  | 71 | 61% |  | 23 | 68% |

|                                 | <b>Group 1: Patient Representatives</b> |          | <b>Group 2: Health Care Professionals</b> |          | <b>Group 3: Researchers</b>     |          |
|---------------------------------|-----------------------------------------|----------|-------------------------------------------|----------|---------------------------------|----------|
|                                 | <b>Scoring each outcome 7-9</b>         |          | <b>Scoring each outcome 7-9</b>           |          | <b>Scoring each outcome 7-9</b> |          |
| <b>Treatment Outcome</b>        | <b>n = 23</b>                           | <b>%</b> | <b>n = 116</b>                            | <b>%</b> | <b>n = 34</b>                   | <b>%</b> |
| <b>1. Maternal Outcomes</b>     |                                         |          |                                           |          |                                 |          |
| Quality of life score           | 15                                      | 65%      | 68                                        | 59%      | 24                              | 71%      |
| Self-care behaviour             | 17                                      | 74%      | 67                                        | 58%      | 19                              | 56%      |
| Satisfaction with treatment     | 15                                      | 65%      | 71                                        | 61%      | 22                              | 65%      |
| Empowerment                     | 16                                      | 70%      | 63                                        | 54%      | 16                              | 47%      |
| Self-efficacy                   | 14                                      | 61%      | 60                                        | 52%      | 18                              | 53%      |
| Health related quality of life  | 14                                      | 61%      | 62                                        | 53%      | 22                              | 65%      |
| Compliance with self monitoring | 16                                      | 70%      | 85                                        | 73%      | 23                              | 68%      |
| Depression                      | 16                                      | 70%      | 68                                        | 59%      | 28                              | 82%      |
| Stress                          | 18                                      | 78%      | 66                                        | 57%      | 21                              | 62%      |
| Post natal depression           | 15                                      | 65%      | 69                                        | 59%      | 26                              | 76%      |

|                                                   |    |     |  |    |     |  |    |     |
|---------------------------------------------------|----|-----|--|----|-----|--|----|-----|
| Adherence to the intervention                     | 15 | 65% |  | 85 | 73% |  | 28 | 82% |
| Behaviour change associated with the intervention | 16 | 70% |  | 77 | 66% |  | 23 | 68% |
| Anxiety                                           | 16 | 70% |  | 59 | 51% |  | 21 | 62% |
| Cost of treatment                                 | 13 | 57% |  | 75 | 65% |  | 25 | 74% |
| Acceptability of treatment                        | 14 | 61% |  | 81 | 70% |  | 29 | 85% |
| Vitamin D level                                   | 12 | 52% |  | 53 | 46% |  | 13 | 38% |
| Glucose fasting                                   | 18 | 78% |  | 90 | 78% |  | 28 | 82% |
| 1 hour glucose tolerance test result              | 19 | 83% |  | 80 | 69% |  | 24 | 71% |
| 2 hour glucose tolerance test result              | 19 | 83% |  | 91 | 78% |  | 28 | 82% |
| Post-prandial glucose level                       | 18 | 78% |  | 83 | 72% |  | 22 | 65% |
| Average glucose level                             | 17 | 74% |  | 63 | 54% |  | 20 | 59% |
| % glucose measurements out of range               | 17 | 74% |  | 75 | 65% |  | 17 | 50% |
| Time to control of glucose level                  | 17 | 74% |  | 71 | 61% |  | 17 | 50% |
| Insulin level                                     | 17 | 74% |  | 41 | 35% |  | 16 | 47% |
| HbA1c                                             | 18 | 78% |  | 82 | 71% |  | 23 | 68% |
| HOMA-IR                                           | 15 | 65% |  | 49 | 42% |  | 15 | 44% |
| Very low density lipoprotein cholesterol          | 11 | 48% |  | 44 | 38% |  | 14 | 41% |
| Free fatty acids                                  | 12 | 52% |  | 39 | 34% |  | 14 | 41% |
| Lipid profile                                     | 12 | 52% |  | 54 | 47% |  | 17 | 50% |

|                                                            |    |     |  |    |     |  |    |     |
|------------------------------------------------------------|----|-----|--|----|-----|--|----|-----|
| High sensitivity CRP                                       | 13 | 57% |  | 34 | 29% |  | 14 | 41% |
| QUICKI                                                     | 14 | 61% |  | 35 | 30% |  | 12 | 35% |
| C peptide                                                  | 13 | 57% |  | 36 | 31% |  | 10 | 29% |
| Carbohydrate intake per day                                | 17 | 74% |  | 72 | 62% |  | 22 | 65% |
| Protein intake per day                                     | 16 | 70% |  | 64 | 55% |  | 19 | 56% |
| Fat intake per day                                         | 13 | 57% |  | 62 | 53% |  | 21 | 62% |
| Blood pressure                                             | 19 | 83% |  | 83 | 72% |  | 26 | 76% |
| HELLP Syndrome                                             | 14 | 61% |  | 70 | 60% |  | 24 | 71% |
| Hypertensive disorders of pregnancy                        | 16 | 70% |  | 78 | 67% |  | 29 | 85% |
| Number of hospitalisations                                 | 12 | 52% |  | 75 | 65% |  | 25 | 74% |
| Polyhydramnios                                             | 16 | 70% |  | 82 | 71% |  | 22 | 65% |
| Placental abruption                                        | 16 | 70% |  | 68 | 59% |  | 23 | 68% |
| Requirement for insulin                                    | 18 | 78% |  | 92 | 79% |  | 29 | 85% |
| Gestational age at insulin therapy                         | 15 | 65% |  | 89 | 77% |  | 26 | 76% |
| Total daily insulin dose                                   | 19 | 83% |  | 81 | 70% |  | 25 | 74% |
| Requirement for metformin                                  | 17 | 74% |  | 81 | 70% |  | 21 | 62% |
| Requirement for pharmacological therapy for hyperglycaemia | 18 | 78% |  | 89 | 77% |  | 29 | 85% |
| Hypoglycaemia                                              | 15 | 65% |  | 78 | 67% |  | 27 | 79% |
| Treatment failure                                          | 16 | 70% |  | 80 | 69% |  | 28 | 82% |
| Gestational weight gain                                    | 17 | 74% |  | 89 | 77% |  | 30 | 88% |
| Change in BMI                                              | 19 | 83% |  | 70 | 60% |  | 21 | 62% |
| Maternal weight at time                                    | 16 | 70% |  | 76 | 66% |  | 22 | 65% |

|                                |    |     |  |    |     |  |        |
|--------------------------------|----|-----|--|----|-----|--|--------|
| of birth                       |    |     |  |    |     |  |        |
| Return to prepregnancy weight  | 17 | 74% |  | 76 | 66% |  | 24 71% |
| Induction of labour            | 14 | 61% |  | 70 | 60% |  | 21 62% |
| Prolonged labour               | 12 | 52% |  | 52 | 45% |  | 19 56% |
| Duration of labour             | 12 | 52% |  | 54 | 47% |  | 15 44% |
| Premature rupture of membranes | 12 | 52% |  | 54 | 47% |  | 17 50% |
| Birth complication             | 17 | 74% |  | 79 | 68% |  | 28 82% |
| Mode of birth                  | 15 | 65% |  | 81 | 70% |  | 29 85% |
| Reason for caesarean birth     | 15 | 65% |  | 82 | 71% |  | 27 79% |
| Perineal trauma                | 12 | 52% |  | 71 | 61% |  | 22 65% |
| Blood loss during birth        | 14 | 61% |  | 48 | 41% |  | 19 56% |
| Post partum haemorrhage        | 15 | 65% |  | 59 | 51% |  | 21 62% |
| Chorioamnionitis               | 13 | 57% |  | 55 | 47% |  | 17 50% |
| Maternal ICU admission         | 14 | 61% |  | 74 | 64% |  | 26 76% |
| Postpartum infection           | 13 | 57% |  | 59 | 51% |  | 22 65% |
| Breast feeding                 | 14 | 61% |  | 78 | 67% |  | 29 85% |
| Maternal mortality             | 16 | 70% |  | 82 | 71% |  | 31 91% |
| Maternal serious morbidity     | 16 | 70% |  | 83 | 72% |  | 29 85% |
| Development of type 2 diabetes | 19 | 83% |  | 94 | 81% |  | 32 94% |
| Post pregnancy weight          | 17 | 74% |  | 83 | 72% |  | 26 76% |
| <b>2. Neonatal Outcomes</b>    |    |     |  |    |     |  |        |
| Fetal growth restriction       | 14 | 61% |  | 82 | 71% |  | 25 74% |
| Macrosomia                     | 16 | 70% |  | 87 | 75% |  | 26 76% |



|                                        |    |     |  |    |     |  |    |     |
|----------------------------------------|----|-----|--|----|-----|--|----|-----|
| Birthweight                            | 16 | 70% |  | 91 | 78% |  | 31 | 91% |
| Large for gestational age              | 15 | 65% |  | 90 | 78% |  | 31 | 91% |
| Small for gestational age              | 13 | 57% |  | 84 | 72% |  | 30 | 88% |
| Gestational age at birth               | 17 | 74% |  | 92 | 79% |  | 29 | 85% |
| Preterm birth                          | 16 | 70% |  | 83 | 72% |  | 22 | 65% |
| Neonatal arm circumference             | 11 | 48% |  | 48 | 41% |  | 14 | 41% |
| Birth length                           | 12 | 52% |  | 57 | 49% |  | 21 | 62% |
| Neonatal chest circumference           | 11 | 48% |  | 40 | 34% |  | 17 | 50% |
| Neonatal head circumference            | 12 | 52% |  | 52 | 45% |  | 20 | 59% |
| APGAR                                  | 15 | 65% |  | 72 | 62% |  | 28 | 82% |
| Congenital malformation                | 15 | 65% |  | 76 | 66% |  | 25 | 74% |
| Pondoral index                         | 14 | 61% |  | 54 | 47% |  | 21 | 62% |
| Shoulder dystocia                      | 13 | 57% |  | 86 | 74% |  | 26 | 76% |
| Bone fracture                          | 13 | 57% |  | 70 | 60% |  | 25 | 74% |
| Brachial plexus injury                 | 13 | 57% |  | 75 | 65% |  | 27 | 79% |
| Neonatal mortality                     | 15 | 65% |  | 86 | 74% |  | 28 | 82% |
| Birth trauma                           | 15 | 65% |  | 82 | 71% |  | 27 | 79% |
| Neonatal hypoglycaemia                 | 16 | 70% |  | 93 | 80% |  | 28 | 82% |
| Need for IV glucose                    | 18 | 78% |  | 83 | 72% |  | 25 | 74% |
| Neonatal glucose level                 | 18 | 78% |  | 76 | 66% |  | 24 | 71% |
| Neonatal sepsis                        | 14 | 61% |  | 63 | 54% |  | 23 | 68% |
| Neonatal respiratory distress syndrome | 14 | 61% |  | 74 | 64% |  | 24 | 71% |
| Transient tachypnoea of the newborn    | 13 | 57% |  | 65 | 56% |  | 21 | 62% |
| Bronchopulmonary                       | 13 | 57% |  | 51 | 44% |  | 17 | 50% |

|                                            |    |     |  |    |     |  |    |     |
|--------------------------------------------|----|-----|--|----|-----|--|----|-----|
| dysplasia                                  |    |     |  |    |     |  |    |     |
| Neonatal internal haemorrhage              | 13 | 57% |  | 53 | 46% |  | 17 | 50% |
| Necrotising enterocolitis                  | 12 | 52% |  | 48 | 41% |  | 15 | 44% |
| Hyperbilirubinemia                         | 11 | 48% |  | 66 | 57% |  | 23 | 68% |
| Need for phototherapy                      | 11 | 48% |  | 60 | 52% |  | 20 | 59% |
| Neonatal intensive care unit admission     | 15 | 65% |  | 80 | 69% |  | 25 | 74% |
| Infant sex                                 | 9  | 39% |  | 50 | 43% |  | 21 | 62% |
| Neonatal hypocalcaemia                     | 13 | 57% |  | 45 | 39% |  | 14 | 41% |
| Umbilical cord PH                          | 11 | 48% |  | 56 | 48% |  | 14 | 41% |
| Miscarriage                                | 14 | 61% |  | 69 | 59% |  | 23 | 68% |
| Neonatal mortality                         | 15 | 65% |  | 85 | 73% |  | 29 | 85% |
| Neonatal hospitalisation                   | 14 | 61% |  | 78 | 67% |  | 27 | 79% |
| Livebirth                                  | 16 | 70% |  | 81 | 70% |  | 28 | 82% |
| Stillbirth                                 | 16 | 70% |  | 82 | 71% |  | 29 | 85% |
| Perinatal death                            | 16 | 70% |  | 85 | 73% |  | 29 | 85% |
| Diabetes in adulthood                      | 17 | 74% |  | 81 | 70% |  | 26 | 76% |
| Adiposity in adulthood                     | 16 | 70% |  | 74 | 64% |  | 22 | 65% |
| Neurosensory disability in later childhood | 14 | 61% |  | 55 | 47% |  | 18 | 53% |
| Childhood adiposity                        | 14 | 61% |  | 74 | 64% |  | 23 | 68% |
| Neonatal adiposity                         | 14 | 61% |  | 70 | 60% |  | 23 | 68% |
| Childhood BMI                              | 14 | 61% |  | 71 | 61% |  | 21 | 62% |

**ESM Table 3: e-Delphi round 1 participants**

|                 |            |               |
|-----------------|------------|---------------|
| Argentina       | 9          | 5.2%          |
| Australia       | 3          | 1.7%          |
| Austria         | 6          | 3.5%          |
| Canada          | 20         | 11.6%         |
| China           | 1          | 0.6%          |
| Colombia        | 1          | 0.6%          |
| Denmark         | 6          | 3.5%          |
| UK              | 8          | 4.6%          |
| France          | 2          | 1.2%          |
| Germany         | 1          | 0.6%          |
| Greece          | 2          | 1.2%          |
| India           | 2          | 1.2%          |
| Ireland         | 69         | 39.9%         |
| Italy           | 5          | 2.9%          |
| Japan           | 1          | 0.6%          |
| Lithuania       | 1          | 0.6%          |
| Malta           | 3          | 1.7%          |
| Morocco         | 1          | 0.6%          |
| The Netherlands | 6          | 3.5%          |
| New Zealand     | 3          | 1.7%          |
| Poland          | 1          | 0.6%          |
| Romania         | 1          | 0.6%          |
| Saudia Arabia   | 1          | 0.6%          |
| Singapore       | 1          | 0.6%          |
| Spain           | 1          | 0.6%          |
| Sweden          | 1          | 0.6%          |
| USA             | 16         | 9.2%          |
| <b>Total</b>    | <b>173</b> | <b>100.0%</b> |

**ESM Table 4: List of GDM prevention and treatment outcomes carried forward from round 2 and their status following round three voting and discussion at the consensus meeting.**

| <b>Prevention Outcomes</b>             | <b>Consensus following Round 3 vote</b> | <b>Consensus following meeting</b> |
|----------------------------------------|-----------------------------------------|------------------------------------|
| <b>1. Maternal Outcomes</b>            |                                         |                                    |
| GDM Diagnosis                          | Consensus in                            | Consensus in                       |
| Gestational Weight Gain                | Consensus in                            | Consensus in                       |
| Requirement for insulin therapy        | Consensus in                            | Consensus out                      |
| Blood pressure                         | No consensus                            | Consensus out                      |
| Hypertensive disorders of pregnancy    | Consensus in                            | Consensus in                       |
| Physical activity                      | No consensus                            | Consensus out                      |
| Fasting blood glucose                  | Consensus in                            | Consensus out                      |
| Postprandial glucose                   | Consensus in                            | Consensus out                      |
| Hba1c                                  | Consensus in                            | Consensus out                      |
| <b>2. Neonatal Outcomes</b>            |                                         |                                    |
| Preterm birth                          | Consensus in                            | Consensus in                       |
| Gestational week at birth <sup>a</sup> | Consensus in                            | Consensus in                       |
| Neonatal death                         | Consensus in                            | Consensus in                       |
| Stillbirth                             | Consensus in                            | Consensus in                       |
| Small for gestational age              | Consensus in                            | Consensus in                       |
| Large for gestational age              | Consensus in                            | Consensus in                       |
| Macrosomia                             | Consensus in                            | Consensus out                      |
| Birthweight                            | Consensus in                            | Consensus in                       |
| Congenital malformation                | No consensus                            | Consensus out                      |
| Brachial plexus injury                 | No consensus                            | Consensus out                      |
| Shoulder dystocia                      | Consensus in                            | Consensus out                      |
| Neonatal hypoglycemia                  | Consensus in                            | Consensus in                       |
| Admission to neonatal ICU              | Consensus in                            | Consensus out                      |

| <b>Treatment Outcomes</b>                                               | <b>Consensus following Round 3 vote</b> | <b>Consensus following meeting</b> |
|-------------------------------------------------------------------------|-----------------------------------------|------------------------------------|
| <b>1. Maternal Outcomes</b>                                             |                                         |                                    |
| Adherence to the intervention                                           | Consensus in                            | Consensus in                       |
| Glucose fasting                                                         | Consensus in                            | Consensus out                      |
| 1 hour glucose tolerance test result                                    | Consensus in                            | Consensus out                      |
| 2 hour glucose tolerance test result                                    | Consensus in                            | Consensus out                      |
| Hypertensive disorders of pregnancy                                     | Consensus in                            | Consensus in                       |
| Requirement for insulin                                                 | Consensus in                            | Consensus out                      |
| Gestational age at insulin therapy                                      | Consensus in                            | Consensus out                      |
| Total daily insulin dose                                                | No consensus                            | Consensus out                      |
| Requirement for pharmacological therapy for hyperglycaemia <sup>b</sup> | Consensus in                            | Consensus in                       |
| Gestational weight gain                                                 | Consensus in                            | Consensus in                       |
| Birth complication                                                      | Consensus in                            | Consensus out                      |
| Mode of birth                                                           | Consensus in                            | Consensus in                       |
| Reason for caesarean birth                                              | No consensus                            | Consensus out                      |
| Maternal mortality                                                      | Consensus in                            | Consensus out                      |
| Maternal serious morbidity                                              | Consensus in                            | Consensus out                      |
| Development of type 2 diabetes                                          | Consensus in                            | Consensus out                      |
| <b>2. Neonatal Outcomes</b>                                             |                                         |                                    |
| Macrosomia                                                              | Consensus in                            | Consensus out                      |
| Birthweight                                                             | Consensus in                            | Consensus in                       |
| Large for gestational age                                               | Consensus in                            | Consensus in                       |
| Small for gestational age                                               | Consensus in                            | Consensus in                       |
| Gestational age at birth                                                | Consensus in                            | Consensus in                       |
| Preterm birth                                                           | Consensus in                            | Consensus in                       |
| Shoulder dystocia                                                       | Consensus in                            | Consensus out                      |

|                                        |              |               |
|----------------------------------------|--------------|---------------|
| Neonatal mortality <sup>c</sup>        | Consensus in | Consensus in  |
| Neonatal hypoglycaemia                 | Consensus in | Consensus in  |
| Need for IV glucose                    | Consensus in | Consensus out |
| Neonatal intensive care unit admission | Consensus in | Consensus out |
| Livebirth                              | Consensus in | Consensus out |
| Stillbirth                             | Consensus in | Consensus in  |
| Perinatal death                        | Consensus in | Consensus out |

<sup>a</sup>rephrased at consensus meeting to “gestational age at birth”

<sup>b</sup>rephrased at consensus meeting to “requirement and type of pharmacological therapy”

<sup>c</sup>rephrased at consensus meeting to “neonatal death”

Identification

Screening

Eligibility

Included

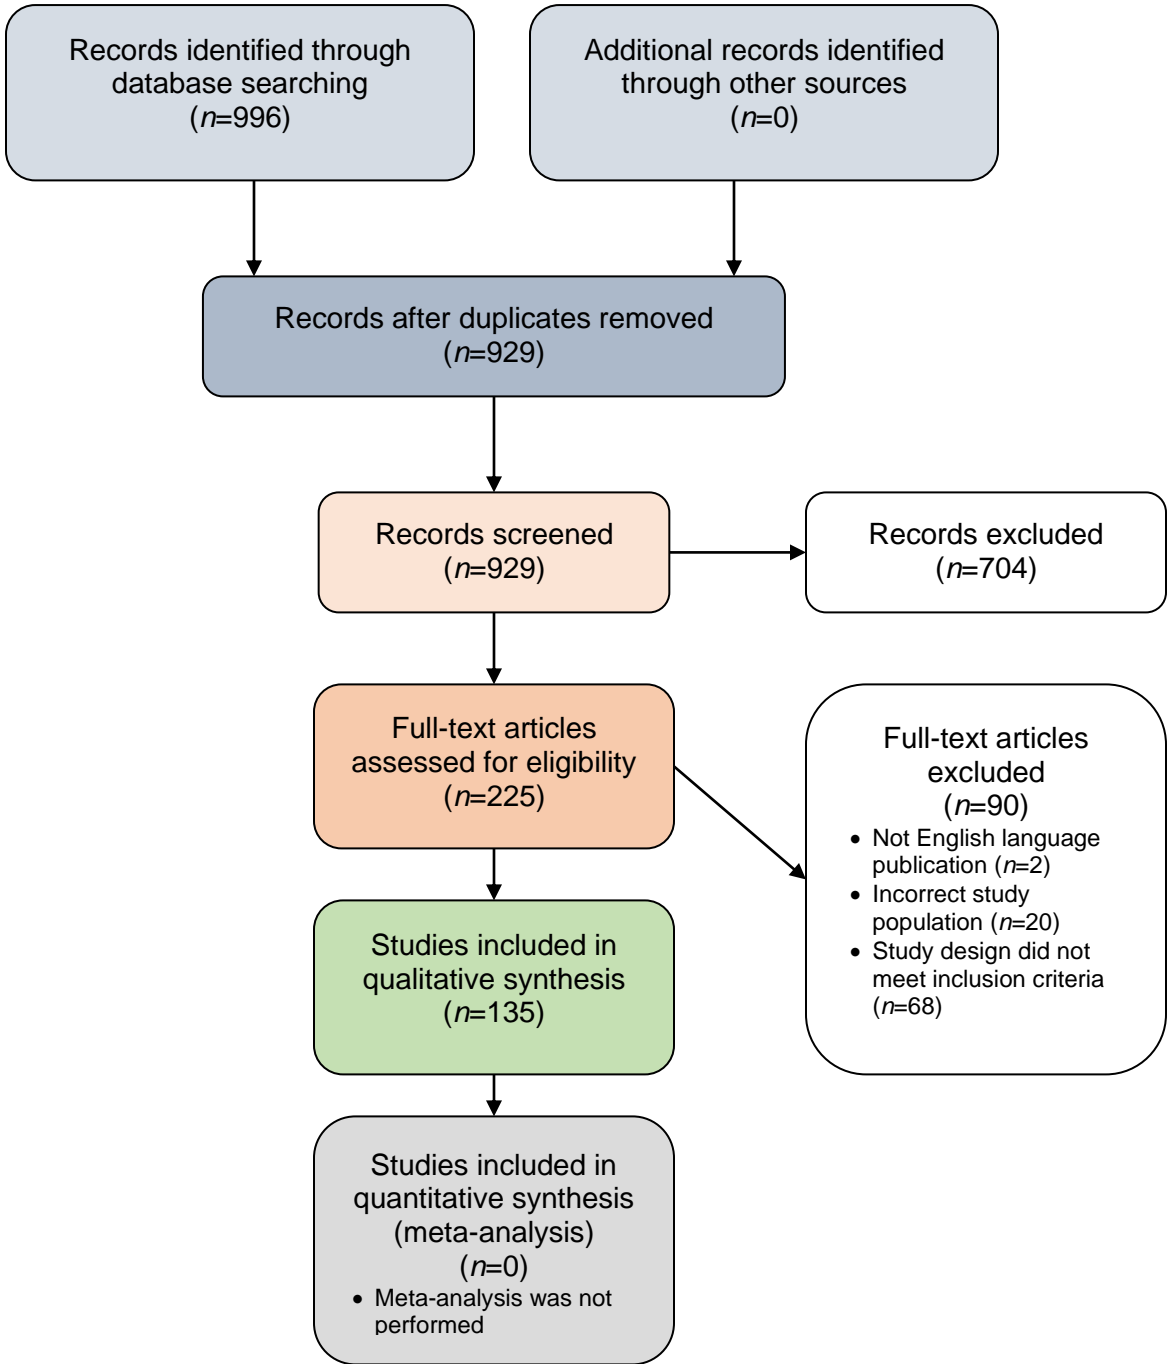

Supplement: MOESM2 [file 17819144]
